# Supplementary material
Source: Royal Society of Chemistry journal article supplement (doi:10.1039/d6nj00726k)
Supplement: d6nj00726k1.pdf [file d6nj00726k1.pdf]

## Supplementary Material for

# **A zwitterionic polyethyleneimine binder in lithium-sulfur batteries: synergistic effects of polysulfide anchoring and Li<sup>+</sup> transport promotion**

Guang Li<sup>1</sup>, Yuehao Bai<sup>1</sup>, Xiaoli Duan, Li Sun, Jiasui Jiang, ChangAn Yang\*,

Yong Tao\*

College of Chemistry and Chemical Engineering, Hunan Institute of Science and Technology,  
Yueyang 414006, Hunan Province, PR China.

E-mail: Chang\_anyang@hnist.edu.cn, ivy\_tao0630@hotmail.com.

<sup>1</sup>These authors contributed equally to this work

## **Supplementary data**

### **Methods:**

#### *Synthesis of lithium 3-chloropropanesulfonyl(trifluoromethanesulfonylimide) (LiCPSI)*

Trifluoromethanesulfonamide (14.9 g, 0.1 mol) and lithium hydroxide (4.8g, 0.2 mol) were added to anhydrous acetonitrile (150 ml). Then 3-chloropropanesulfonyl chloride (17.7 g, 0.1 mol) dispersed in anhydrous acetonitrile (100 ml) was added dropwise to the above mixture under argon protection at 0 °C. After completion of the dropwise addition, the reaction was allowed to continue for 24 h at room temperature. When the reaction was complete, the mixtures were filtered and the filtrates were concentrated by rotary evaporation. The concentrated filtrates were recrystallized three times in dichloromethane to obtain a pure white solid powder. The solid powder obtained was dried in a vacuum oven at 60 °C for 24 h.

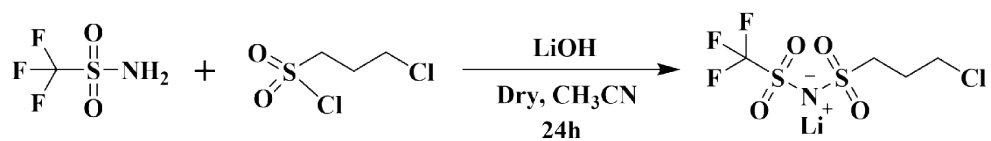

**Fig. S1.** The synthetic route of LiCPSI.

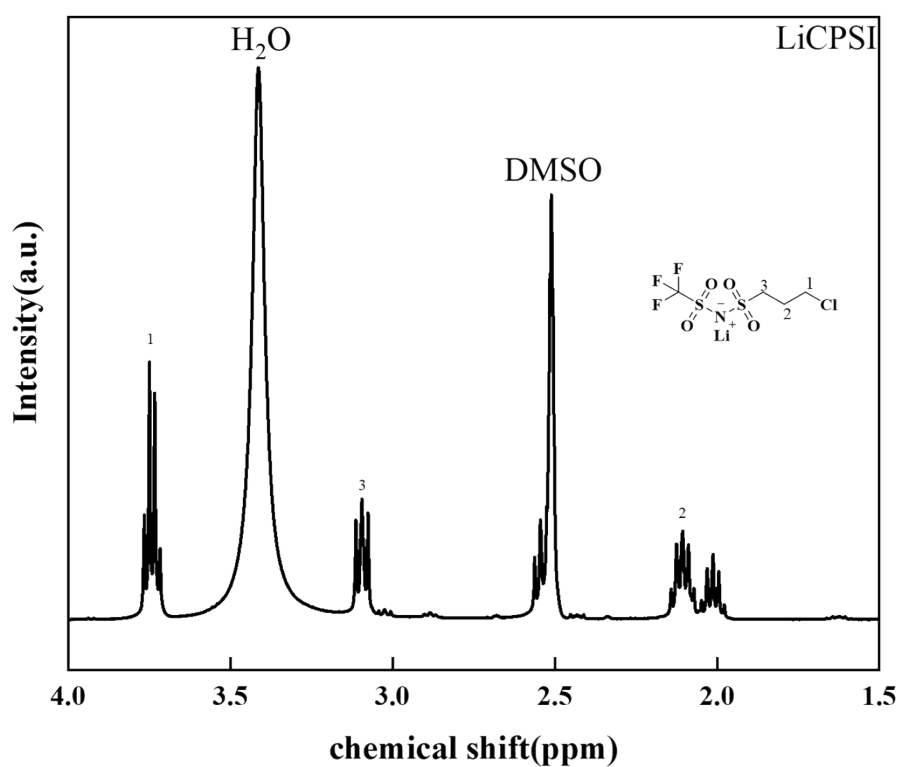

**Fig. S2.** <sup>1</sup>H NMR spectrum of LiCPSI (400 MHz, DMSO-d<sub>6</sub>) δ 3.74 (d, J = 6.5 Hz, 1H), 3.12 – 3.06 (m, 1H), 2.11 (dt, J = 14.0, 6.7 Hz, 1H).

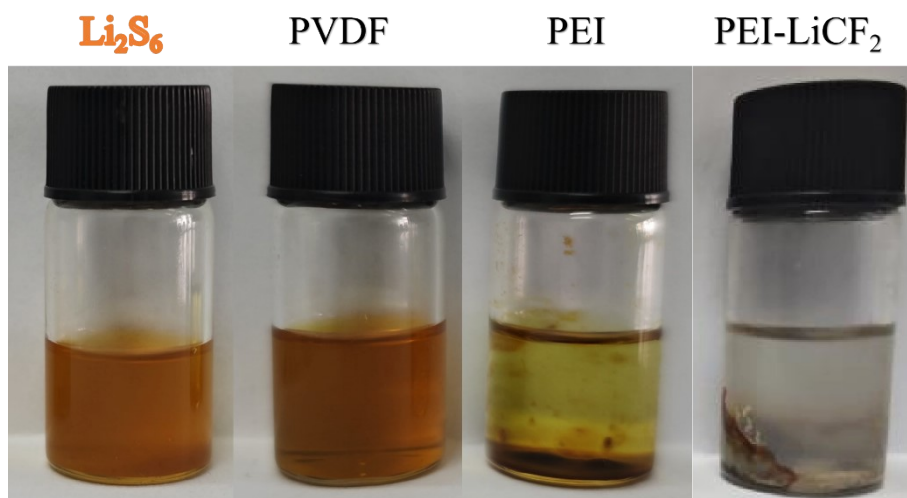

**Fig. S3.** Static adsorption experiment of  $\text{Li}_2\text{S}_6$  by PVDF, PEI, and PEI-LiCF<sub>2</sub> binders.

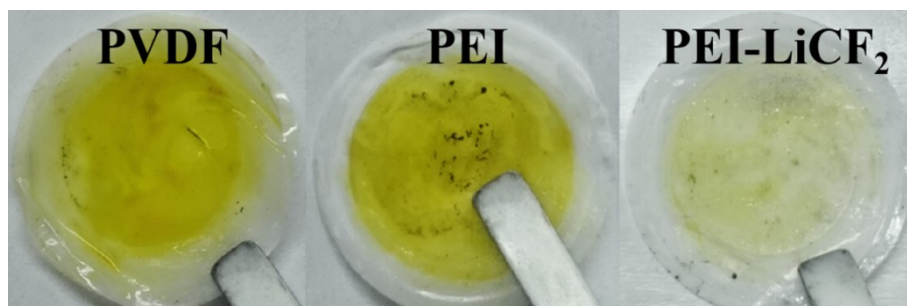

**Fig. S4.** The pictures of separators of PVDF, PEI and PEI-LiCF<sub>2</sub> after 0.1C cycling.

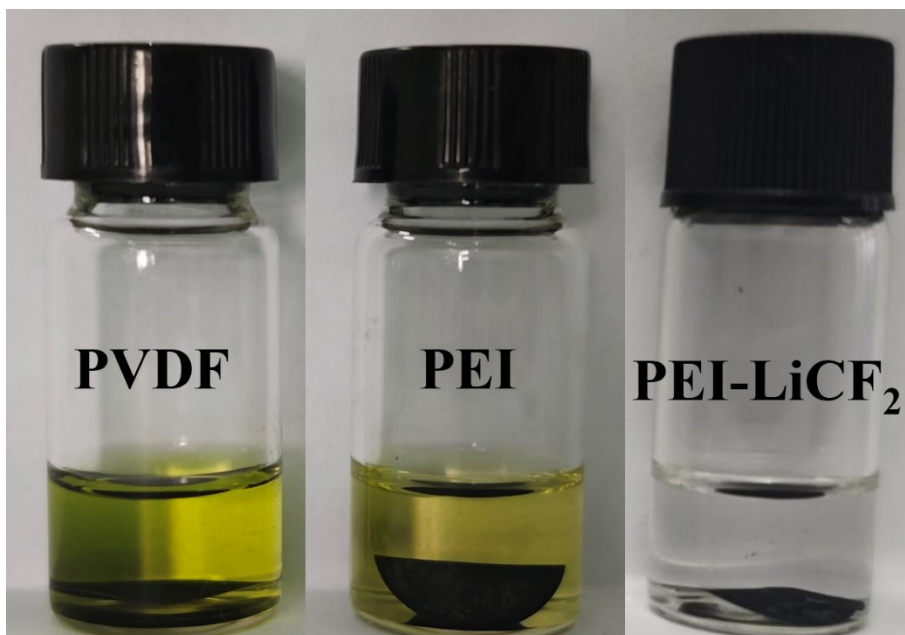

**Fig. S5.** The Pictures of PVDF, PEI and PEI-LiCF<sub>2</sub> cathodes immersed in electrolyte after 0.1C cycling.

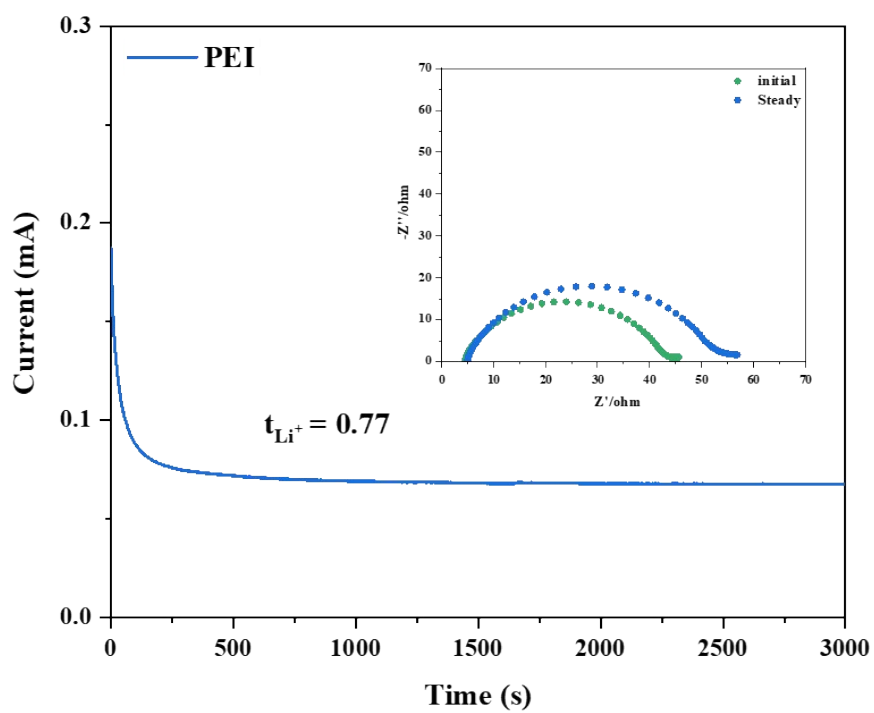

**Fig. S6.** Current-time profiles and EIS curves of Li|| PEI-LiCF<sub>2</sub>||Li

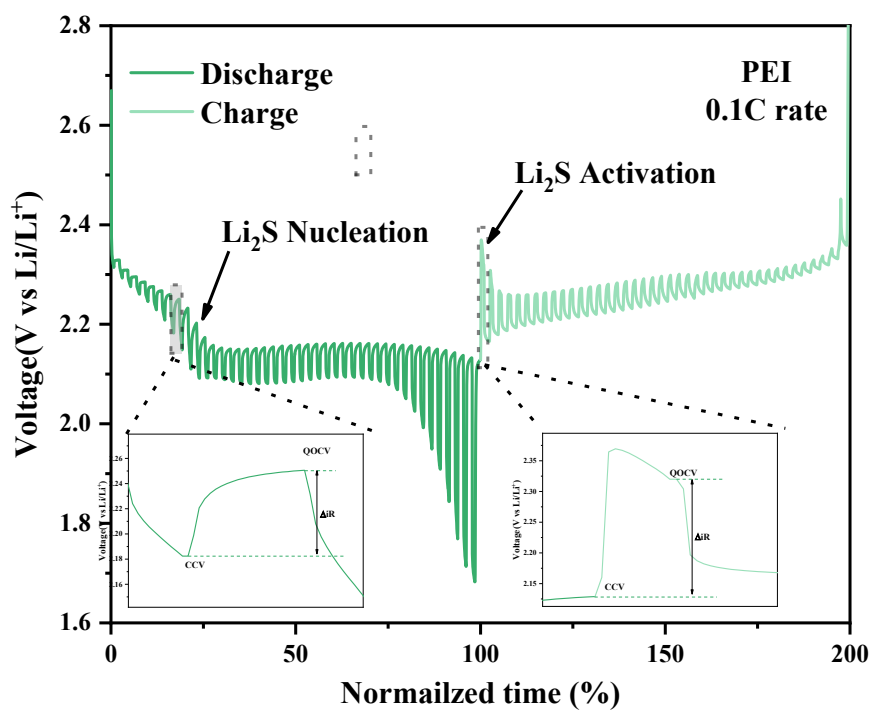

Fig. S7. GITT curve of PEI

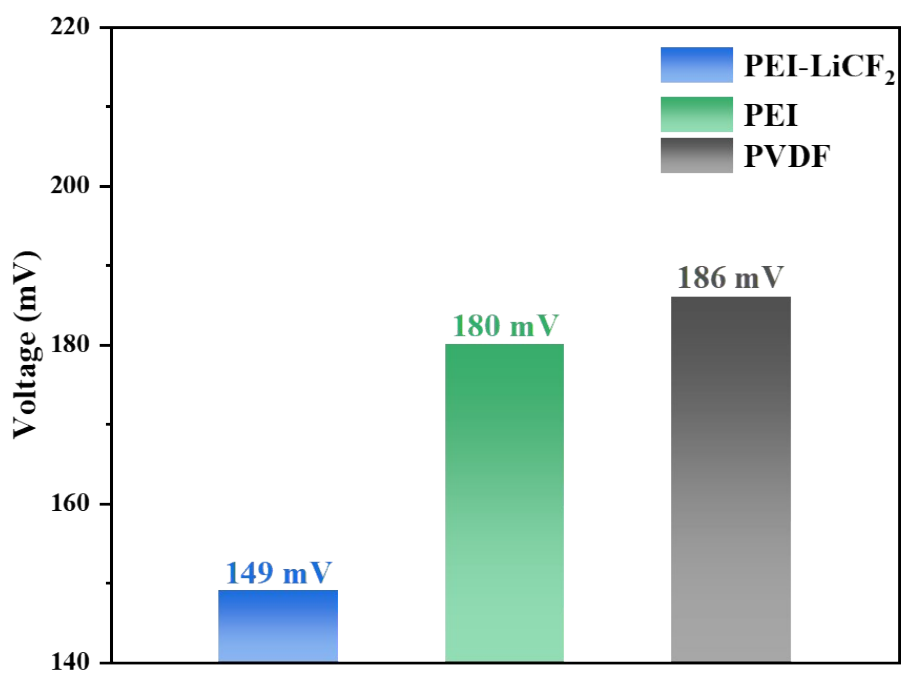

Fig. S8. ΔE value of PEI-LiCF<sub>2</sub>; PEI and PVDF.

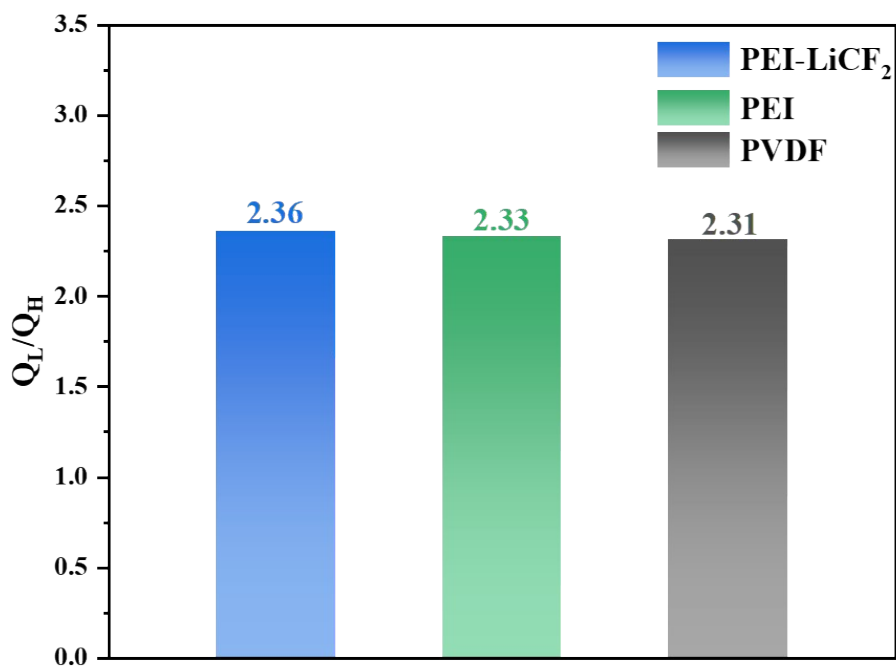

**Fig. S9.**  $Q_L/Q_H$  values of PEI-LiCF<sub>2</sub>, PEI and PVDF

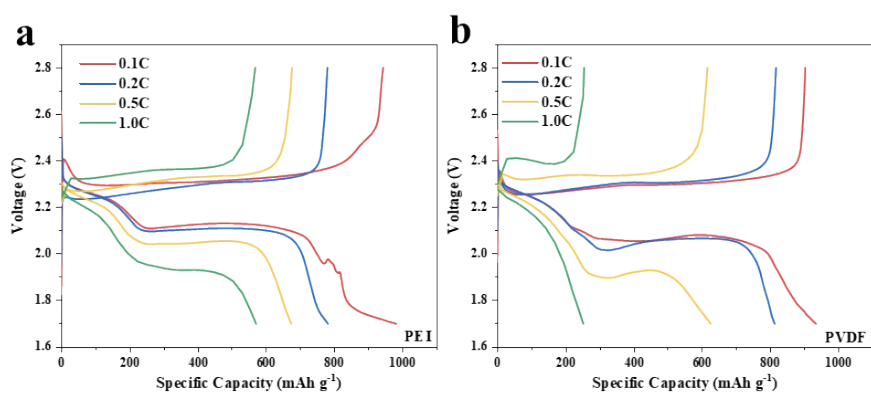

**Fig. S10** Galvanostatic charge-discharge curves of (a) PEI and (b) PVDF electrode at different rates

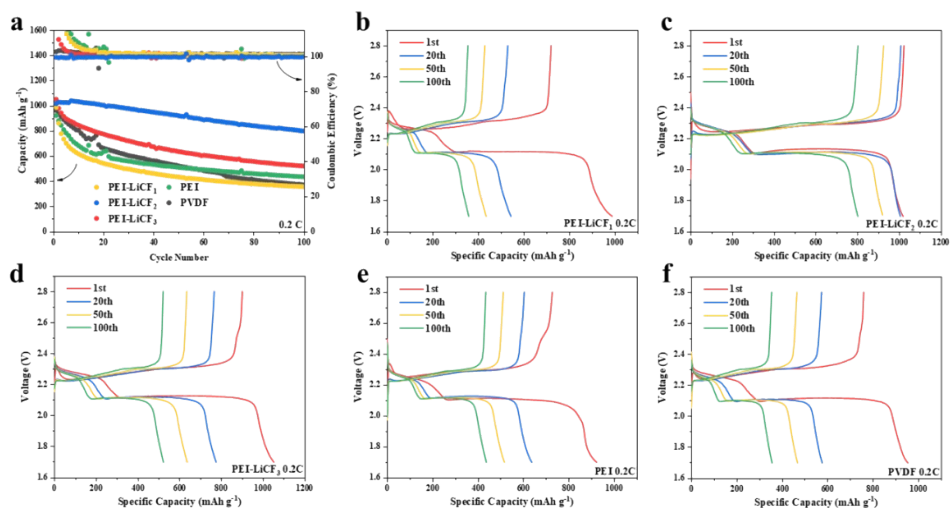

**Fig. S11** (a) Cycling performance of different binders at 0.2 C; Galvanostatic charge-discharge curves of (b) PEI-LiCF<sub>1</sub>; (c) PEI-LiCF<sub>2</sub>; (d) PEI-LiCF<sub>3</sub>; (e) PEI and (f) PVDF with different number of turns.

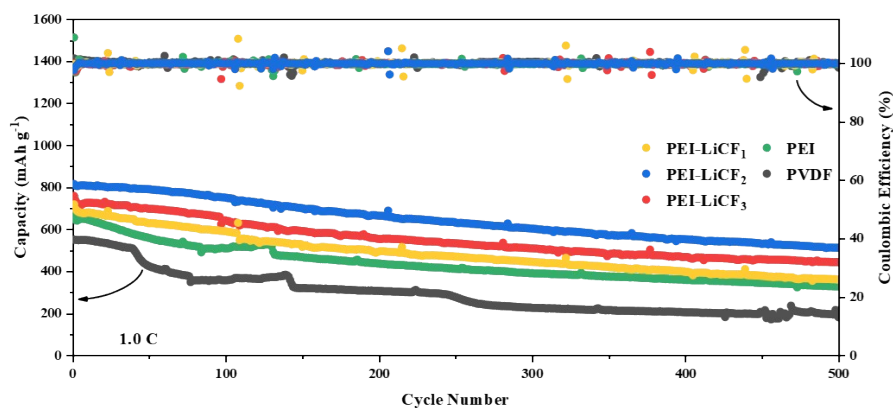

**Fig. S12** Long-term cycling stability at 1 C

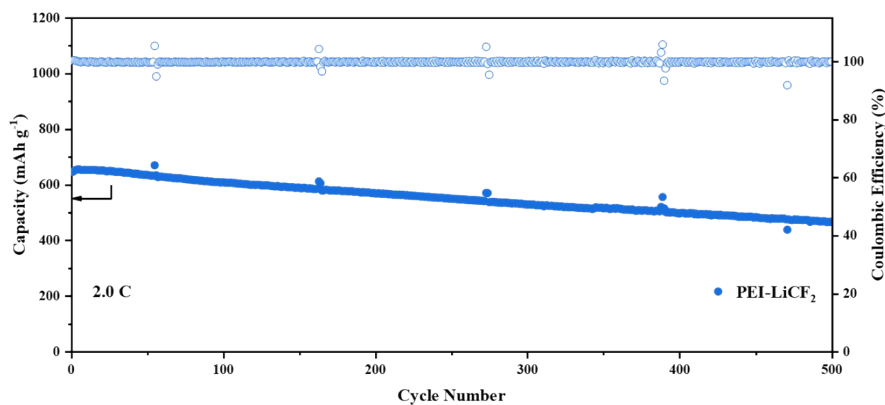

**Fig. S13.** Long-term cycling stability at 2 C

**Table. S1.** Representative work of for Li-S electrodes using different binders in recent years.

| Binders                      | Initial capacity<br>(Current density)   | Final capacity<br>(Cycle number)      | Capacity<br>retention (%) |
|------------------------------|-----------------------------------------|---------------------------------------|---------------------------|
| <b>PEI-LiCF<sub>2</sub></b>  | <b>1017.8 mAh g<sup>-1</sup> (0.2C)</b> | <b>800.5 mAh g<sup>-1</sup> (100)</b> | <b>78.6%</b>              |
| <b>(This work)</b>           | <b>816 mAh g<sup>-1</sup> (1C)</b>      | <b>512 mAh g<sup>-1</sup> (500)</b>   | <b>63%</b>                |
| ChMSA25 <sup>1</sup>         | 417 mAh g <sup>-1</sup> (1C)            | 296 mAh g <sup>-1</sup> (500)         | 71%                       |
| CAB <sup>2</sup>             | 981 mAh g <sup>-1</sup> (0.5C)          | 678 mAh g <sup>-1</sup> (200)         | 69%                       |
| C-PF <sup>3</sup>            | 979.5 mAh g <sup>-1</sup> (0.1C)        | 670 mAh g <sup>-1</sup> (100)         | 68.4%                     |
| PTTG <sup>4</sup>            | 980.28 mAh g <sup>-1</sup> (0.2C)       | 825 mAh g <sup>-1</sup> (80)          | 84%                       |
| c-QACS <sup>5</sup>          | 944.8 mAh g <sup>-1</sup> (0.2C)        | 700 mAh g <sup>-1</sup> (100)         | 74%                       |
| PAM-PAA <sup>6</sup>         | 1008.1 mAh g <sup>-1</sup> (0.2C)       | 600 mAh g <sup>-1</sup> (200)         | 60%                       |
| FBCP <sup>7</sup>            | 730.7 mAh g <sup>-1</sup> (0.2C)        | 518.8 mAh g <sup>-1</sup> (100)       | 71%                       |
| SA-Co-<br>PEDOT <sup>8</sup> | 877.8 mAh g <sup>-1</sup> (0.5C)        | 395 mAh g <sup>-1</sup> (500)         | 45%                       |
| CCS-<br>MWCNTs <sup>9</sup>  | 1016 mAh g <sup>-1</sup> (0.2C)         | 690 mAh g <sup>-1</sup> (100)         | 68%                       |

## References

1. A. Mayrén, J. J. Alcaraz-Espinoza, A. Hernández-Sánchez, I. González and G. Ramos-Sánchez, *Electrochimica Acta*, 2024, **480**, 143917.
2. J. Liu, Z. Chu, P. Li, J. Lin, Y. Yang and Z. Yang, *Colloids and Surfaces A: Physicochemical and Engineering Aspects*, 2023, **670**, 131526.
3. S. Chen, Z. Song, Y. Ji, K. Yang, J. Fang, L. Wang, Z. Wang, Y. Zhao, Y. Zhao, L. Yang and F. Pan, *Small Methods*, 2021, **5**, 2100839.
4. L. Hencz, H. Chen, Z. Wu, X. Gu, M. Li, Y. Tian, S. Chen, C. Yan, A. S. R. Bati, J. G. Shapter, M. Kiefel, D.-S. Li and S. Zhang, *Green Energy & Environment*, 2022, **7**, 1206-1216.
5. Y. Yang, J. Qiu, L. Cai, C. Liu, S. Wu, X. Wei, D. Luo, B. Zhang, X. Yang, K. N. Hui, J. Liu and Z. Lin, *ACS Applied Materials & Interfaces*, 2021, **13**, 33066-33074.
6. Y. Yuan, Z. Li, H. Lu, H. Cheng, D. Zheng and Z. Fang, *New Journal of Chemistry*, 2020, **44**, 10648-10653.
7. D. Chen, M. Song, M. Zhu, T. Zhu, P. Kang, X. Yang and G. Sui, *ACS Applied Energy Materials*, 2022, **5**, 5287-5295.
8. S. Cui, W. Li, H. Hu, T. Wang, Y. Xing, J. Yin, M. Zhang, W. Liu, S. T. Myung and Y. Jin, *Small*, 2024, **20**, 2405823.
9. Q. Gou, L. Lu, S. Lin, W. Zhang, Y. R. Ayllon, Z. Zhou, L. Zhu and Y. Lu, *Macromolecular Rapid Communications*, 2025, **46**, 2500155.
